# Supplementary material for: Water vapor and hydrogen gas diffusion barrier characteristics of Al2O3–alucone multi-layer structures for flexible OLED display applications
Source: Royal Society of Chemistry journal article supplement (doi:10.1039/d1dt02989d), 2021-01-01
Supplement: d1dt02989d1.pdf [file d1dt02989d1.pdf]

## Supporting Information

### Water Vapor and Hydrogen Gas Diffusion Barrier Characteristics of Al<sub>2</sub>O<sub>3</sub>-Alucone Multi-layer Structures for Flexible OLED Display Application

Ju-Hwan Han,<sup>‡a</sup> Tae-Yeon Kim,<sup>‡a</sup> Dong-Yeon Kim,<sup>a</sup> Hae Lin Yang,<sup>a</sup> Jin-Seong Park<sup>\*a</sup>

<sup>1</sup>Division of Materials Science and Engineering, Hanyang University, 222 Wangsimni-ro Seongdong-gu, Seoul 04763, Republic of Korea

<sup>‡</sup>These authors contributed equally to this work. (Ju-Hwan Han ([hjh5235@hanyang.ac.kr](mailto:hjh5235@hanyang.ac.kr)) and Tae-Yeon Kim ([litium13@hanyang.ac.kr](mailto:litium13@hanyang.ac.kr)))

\*Corresponding Author: Jin-Seong Park ([jsparklime@hanyang.ac.kr](mailto:jsparklime@hanyang.ac.kr))

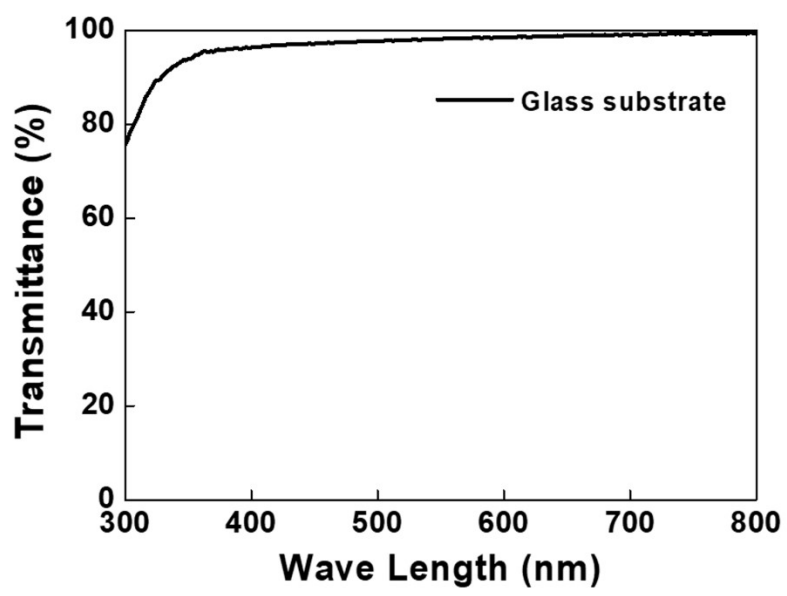

Figure S1. The optical transmittance of uncoated glass substrate.

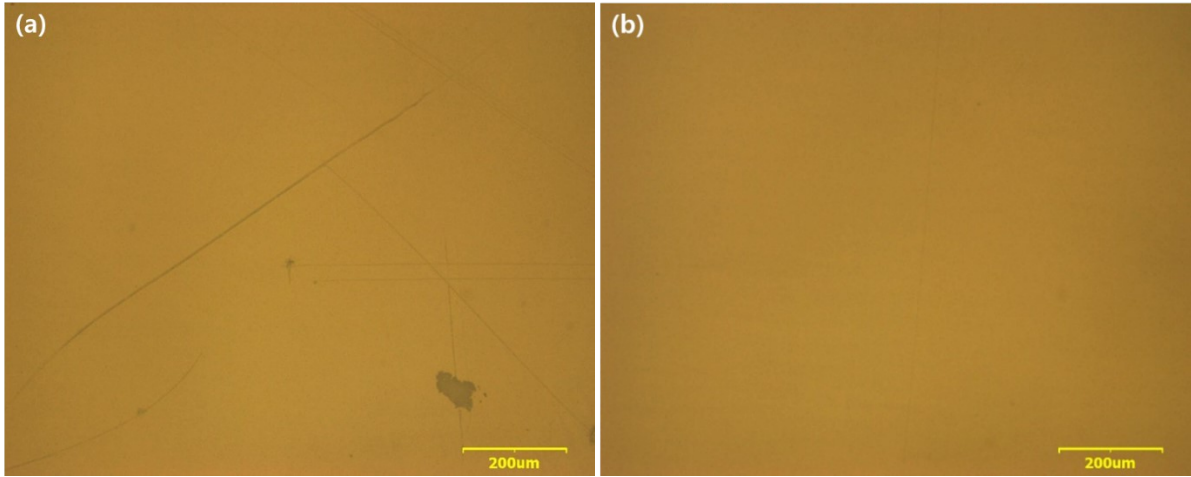

Figure S2. Optical microscopy images of (a) single  $\text{Al}_2\text{O}_3$  and (b) structure B after bending test (5000 bending cycles with 3mm radius).
